# Supplementary material for: Phenotypic and Genotypic Investigation of Carbapenem-Resistant Acinetobacter baumannii in Maharaj Nakhon Si Thammarat Hospital, Thailand
Source: MDPI journal article supplement (doi:10.3390/antibiotics12030580), 2023-03-15
Supplement: s1 [file s1]

---

## Supplementary data

# Phenotypic and Genotypic Investigation of Carbapenem-Resistant *Acinetobacter baumannii* in Maharaj Nakhon Si Thammarat Hospital, Thailand

Sirijan Santajit <sup>1,2,3</sup>, Phuangthip Bhoopong <sup>1</sup>, Thida Kong-Ngoen <sup>3</sup>, Witawat Tunyong <sup>3</sup>, Dararat Horpet <sup>1</sup>, Wanfudhla Paehoh-ele <sup>1</sup>, Tasneem Zahedeng <sup>1</sup>, Pornpan Pumirat <sup>3</sup>, Nitat Sookrung <sup>4,5</sup>, Woranich Hinthong <sup>6</sup> and Nitaya Indrawattana <sup>3,\*</sup>

<sup>1</sup> Department of Medical Technology, School of Allied Health Sciences, Walailak University, Nakhon Si Thammarat 80160, Thailand

<sup>2</sup> Research Center in Tropical Pathobiology, Walailak University, Nakhon Si Thammarat 80160, Thailand

<sup>3</sup> Department of Microbiology and Immunology, Faculty of Tropical Medicine, Mahidol University, Bangkok 10400, Thailand

<sup>4</sup> Siriraj Center of Research Excellence in Allergy and Immunology, Faculty of Medicine Siriraj Hospital, Mahidol University, Bangkok 10700, Thailand

<sup>5</sup> Biomedical Research Incubator Unit, Department of Research, Faculty of Medicine Siriraj Hospital, Mahidol University, Bangkok 10700, Thailand

<sup>6</sup> Princess Srisavangavadhana College of Medicine, Chulabhorn Royal Academy, Bangkok 10210, Thailand

\* Correspondence: nitaya.ind@mahidol.ac.th; Tel.: +66-2-354-9100 (ext. 1598)

**Table. S1** PCR primers used for amplification of different drug resistance- and biofilm associated genes.

| Gene Name                        | Oligonucleotide Sequence (5'-3')                                                | Product Size (bp) | Annealing Temperature (°C) | References |
|----------------------------------|---------------------------------------------------------------------------------|-------------------|----------------------------|------------|
| <i>bla<sub>VIM</sub></i>         | Forward: GATGGTGTTTGGTCGCATA<br>Reverse: CGAATGCGCAGCACCAG                      | 390               | 60                         | [23,24]    |
| <i>bla<sub>IMP</sub></i>         | Forward: GAAGGCGTTTATGTTTCATAC<br>Reverse: GTAAGTTTCAAGAGTGATGC                 | 382               | 56                         | [23,24]    |
| <i>bla<sub>NDM</sub></i>         | Forward: GGTTCGGCGATCTGGTTTTC<br>Reverse: CGGAATGGCTCATCACGATC                  | 621               | 61                         | [23,24]    |
| <i>bla<sub>OXA-23-like</sub></i> | Forward: GATCGGATTGGAGAACCAGA<br>Reverse: ATTTCTGACCGCATTTCCAT                  | 501               | 60                         | [24,25]    |
| <i>bla<sub>OXA-24-like</sub></i> | Forward: GGTTAGTTGGCCCCCTTAAA<br>Reverse: AGTTGAGCGAAAAGGGGATT                  | 246               | 61                         | [24,25]    |
| <i>bla<sub>OXA-51-like</sub></i> | Forward: TAATGCTTTGATCGGCCTTG<br>Reverse: TGGATTGCACTTCATCTTGG                  | 353               | 60                         | [24,25]    |
| <i>csuE</i>                      | Forward: ATGCATGTTCTCTGGACTGATGTTGAC<br>Reverse: CGACTTGTACCGTGACCGTATCTTGATAAG | 976               | 60                         | [3]        |
| <i>pgaB</i>                      | Forward: AAGAAAATGCCTGTGCCGACCA<br>Reverse: GCGAGACCTGCAAAGGGCTGAT              | 490               | 57                         | [3]        |
